# Supplementary material for: Comparative cytokine profiling identifies common and unique serum cytokine responses in acute chikungunya and dengue virus infection
Source: PubMed Central journal article supplement (PMC8254284; doi:10.1186/s12879-021-06339-6), 2021-07-02

**DENV-1**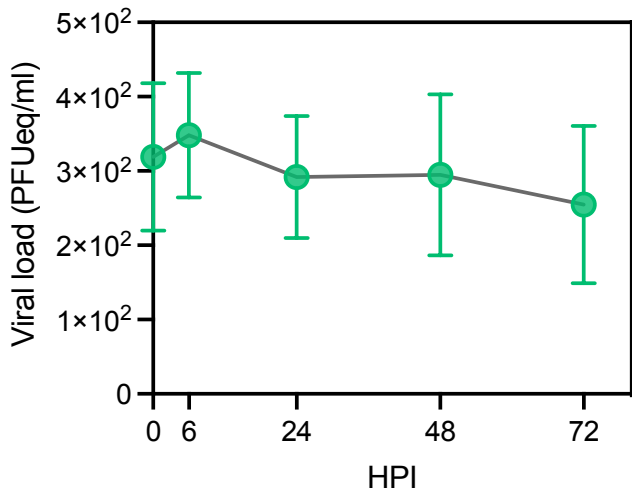**DENV-2**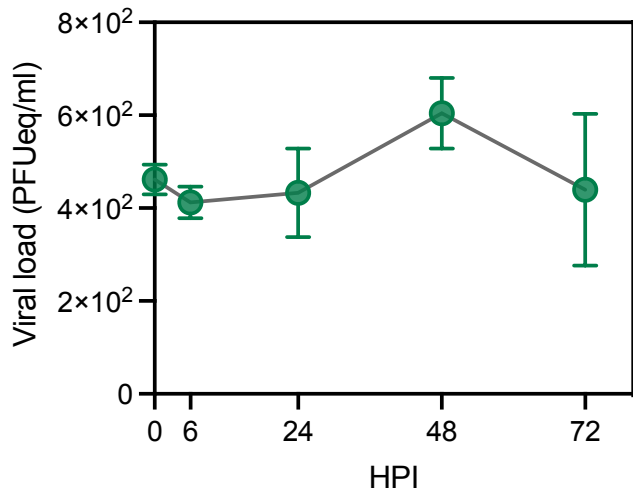**DENV-3**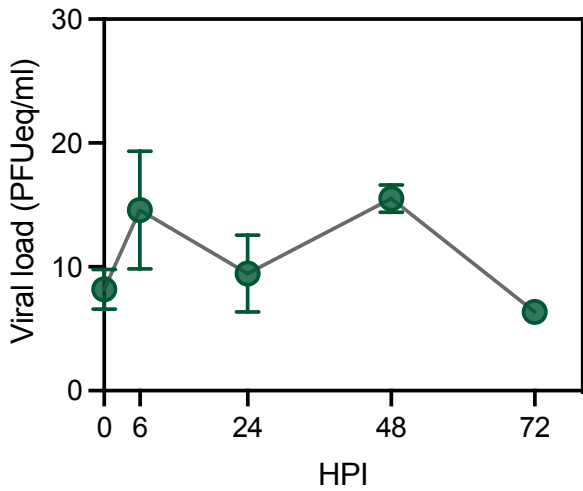**DENV-4**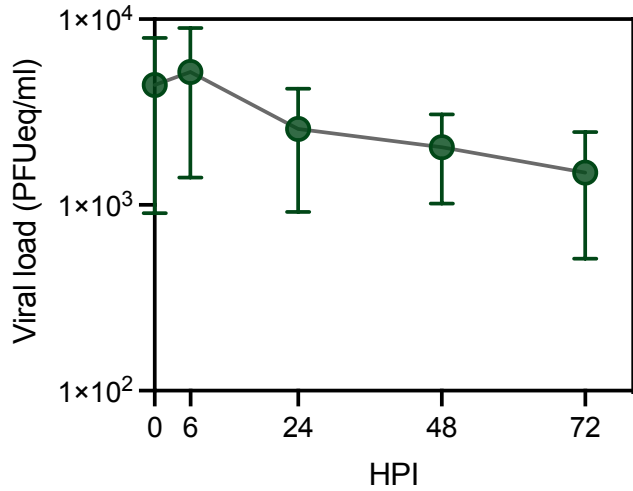**CHIKV**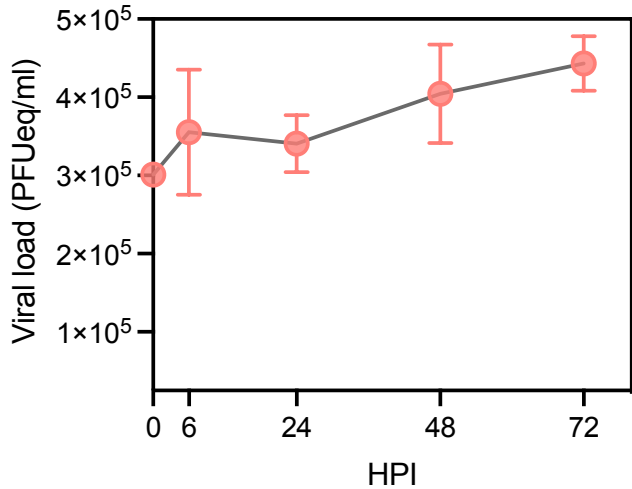

Supplement: 12879_2021_6339_MOESM1_ESM.pdf [file 12879_2021_6339_MOESM1_ESM.pdf]
